1 Identification of hidden population structure in  
2 time-scaled phylogenies

3 Erik M. Volz<sup>1,\*</sup>, Carsten Wiuf<sup>2</sup>, Yonatan H. Grad<sup>3</sup>, Simon D.W.  
4 Frost<sup>4,5</sup>, Ann M. Dennis<sup>6</sup>, and Xavier Didelot<sup>7</sup>

5 <sup>1</sup>*Department of Infectious Disease Epidemiology and MRC Centre for Global  
6 Infectious Disease Analysis, Imperial College London*

7 <sup>2</sup>*Department of Mathematical Sciences, University of Copenhagen*

8 <sup>3</sup>*Department of Immunology and Infectious Diseases, TH Chan School of Public  
9 Health, Harvard University*

10 <sup>4</sup>*Department of Veterinary Medicine, University of Cambridge*

11 <sup>5</sup>*The Alan Turing Institute*

12 <sup>6</sup>*School of Medicine, University of North Carolina Chapel Hill*

13 <sup>7</sup>*School of Life Sciences and Department of Statistics, University of Warwick*

14 \* *Corresponding author: Norfolk Place, W2 1PG, United Kingdom; E-mail:  
15 e.volz@imperial.ac.uk*

16

## Abstract

Population structure influences genealogical patterns, however data pertaining to how populations are structured are often unavailable or not directly observable. Inference of population structure is highly important in molecular epidemiology where pathogen phylogenetics is increasingly used to infer transmission patterns and detect outbreaks. Discrepancies between observed and idealised genealogies, such as those generated by the coalescent process, can be quantified, and where significant differences occur, may reveal the action of natural selection, host population structure, or other demographic and epidemiological heterogeneities. We have developed a fast non-parametric statistical test for detection of cryptic population structure in time-scaled phylogenetic trees. The test is based on contrasting estimated phylogenies with the theoretically expected phylodynamic ordering of common ancestors in two clades within a coalescent framework. These statistical tests have also motivated the development of algorithms which can be used to quickly screen a phylogenetic tree for clades which are likely to share a distinct demographic or epidemiological history. Epidemiological applications include identification of outbreaks in vulnerable host populations or rapid expansion of genotypes with a fitness advantage. To demonstrate the utility of these methods for outbreak detection, we applied the new methods to large phylogenies reconstructed from thousands of HIV-1 partial *pol* sequences. This revealed the presence of clades which had grown rapidly in the recent past, and was significantly concentrated in young men, suggesting recent and rapid transmission in that group. Furthermore, to demonstrate the utility of these methods for the study of antimicrobial resistance, we applied the new methods to a large phylogeny reconstructed from whole genome *Neisseria gonorrhoeae* sequences. We find that population structure detected using these methods closely overlaps with the appearance and expansion of mutations conferring antimicrobial resistance.

48           Quantifying the role of population structure in shaping genetic  
49 diversity is a longstanding problem in population genetics. When information  
50 about how lineages are sampled is available, primarily geographic location, a  
51 variety of statistics are available for describing the magnitude and role of  
52 population structure (Hartl et al. 1997). In pathogen phylogenetics, such  
53 geographic ‘meta-data’ has been instrumental in enabling the inference of  
54 transmission rates over space (Dudas et al. 2017), host species (Lam et al.  
55 2015), and even individual hosts (De Maio et al. 2018). Population structure  
56 shapes genetic diversity, but can the existence of structure be inferred directly  
57 from genetic data in the absence of structural covariates associated with each  
58 lineage, such as if the geographic location or host species of a lineage is  
59 unknown?

60           The problem of detecting and quantifying such ‘cryptic’ population  
61 structure has become a pressing issue in several areas of microbial  
62 phylogenetics. For example, in bacterial population genomics studies, a wide  
63 diversity of methods have been recently developed to classify taxonomic units  
64 based on distributions of genetic relatedness (Mostowy et al. 2017; Tonkin-Hill  
65 et al. 2019, 2018; Beugin et al. 2018). In a different domain, pathogen  
66 sequence data have been used for epidemiological surveillance, and ‘clustering’  
67 patterns of closely related sequences have been used to aid outbreak  
68 investigations and prioritise public health interventions (Eyre et al. 2012;  
69 Dennis et al. 2014; Miller et al. 2014; Ledda et al. 2017). In both population  
70 genomics studies and outbreak investigations, a common thread is the absence  
71 of variables about sampled lineages that can be correlated with phylogenetic  
72 patterns. For example, in outbreak investigations, host risk behaviour and  
73 transmission patterns are not usually observed and must be inferred. It is not  
74 known a priori which clades are more or less likely to expand in the future,

75 although there is active research addressing this problem, such as to predict  
76 the emergence of strains of influenza A virus (Klingen et al. 2018) or the  
77 forecast the effect of antibiotic usage policies on the prevalence of resistant  
78 variants (Whittles et al. 2017).

79 In time-scaled phylogenies, the effects of population structure often  
80 appear as a difference in the distribution of branch lengths in clades circulating  
81 in different populations (Dearlove and Frost 2015). Figure 1 shows a simulated  
82 genealogy from a structured coalescent process (Notohara 1990). In two clades,  
83 the effective population size grows exponentially, and in the remaining clade,  
84 the effective size remains constant. Consequently, the lineages through time  
85 show noticeably different patterns of relatedness. For the clades with growing  
86 size, most coalescent events occur in the distant past when the size was small.

87 Supposing that the deme from which lineages were sampled was not  
88 observed, it is clear from visual inspection of Figure 1 which lineages were  
89 sampled from a growing population. Nevertheless, there is a paucity of  
90 objective methods readily available to automate the process of identifying  
91 temporally distinct clades. This process cannot be done manually when the  
92 differences in distributions are less obvious, and needs to be based on a  
93 theoretically grounded statistical test. Furthermore, in Figure 1, the red and  
94 yellow clades are distantly related. Their most recent common ancestor  
95 (MRCA) is at the root of the tree, but they have a very similar distribution of  
96 coalescent times suggesting that they were generated by similar demographic  
97 or epidemiological processes. For example, this can happen in infectious  
98 disease epidemics, when lineages independently colonise the same host  
99 population with greater susceptibility or higher risk behaviour (Dearlove et al.  
100 2017). It is therefore also desirable to have an automated method for  
101 identifying polyphyletic taxonomic groups defined by shared inferred

102 population histories as opposed to genetic or phenotypic traits.

103           Here we develop a statistical test for detecting if clades within a  
104 time-scaled genealogy have evidence for unobserved population structure. Our  
105 approach is to develop a statistic based on an unstructured coalescent process.  
106 This allows us to test a null hypothesis that two clades are both generated by  
107 the same coalescent process. In this case, the coalescent model provides a  
108 theoretical prediction of the order of the coalescent times between the two  
109 clades in the absence of population structure. On the basis of this statistical  
110 test, we also develop algorithms for systematically exploring possible partitions  
111 of a genealogy into distinct sets representing evolution within latent  
112 populations with different demographic or epidemic histories. Notably, these  
113 algorithms not only allow us to detect outlying clades with very different  
114 genealogical patterns, but also to find and classify distantly related clades  
115 which likely have similar demographic or epidemic histories.

## 124 **Materials and Methods**

125 As a starting point for our methodology, we assume a time-scaled phylogeny  
126 has been estimated from genetic data, for example using one of the recently  
127 developed fast methods (To et al. 2016; Volz and Frost 2017; Didelot et al.  
128 2018; Sagulenko et al. 2018; Tamura et al. 2018; Miura et al. 2019).  
129 Alternatively, summary trees obtained from full Bayesian approaches as  
130 implemented in BEAST (Suchard et al. 2018; Bouckaert et al. 2014) or  
131 RevBayes (Höhna et al. 2016) can be used, although these typically  
132 incorporate population genetic models which presume a particular form of  
133 population structure or a lack of population structure. Some precise  
134 terminology and notation is required related to the structure of these  
135 time-scaled trees since the basis of our approach concerns comparisons

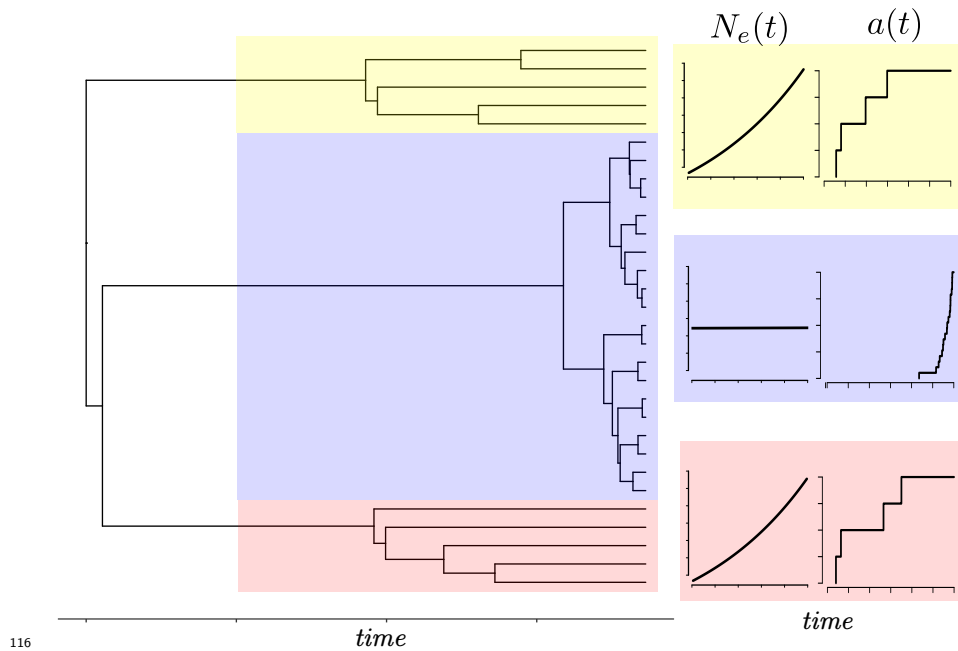

117 Figure 1: A genealogy simulated from a structured coalescent process with two  
118 demes, one of which has constant effective population size (clade highlighted  
119 in blue), and the other having effective population size growing exponentially  
120 (clades highlighted in red and yellow). Migration of lineages occurs at a small  
121 constant rate in one direction from the constant size deme to the growing deme.  
122 The corresponding plots at the right show a caricature of the effective population  
123 size and lineages through time in each clade.

136 between different subsets of the tree.

## 137 Notation

138 The tree has  $n$  terminal nodes (nodes with no descendants), is rooted, and is  
139 bifurcating (there are  $n - 1$  internal nodes each with exactly two descendants).

140 Being rooted implies there is one node with no ancestor. Mathematically we  
141 describe this tree as a node-labelled directed acyclic graph:

$$\mathcal{G} = (\mathcal{N}, \mathcal{E}, \tau)$$

142 where  $\mathcal{N}$  is a set of  $2n - 1$  nodes,  $\mathcal{E} \subseteq \{(u, v) | u, v \in \mathcal{N}^2\}$  is the set of  $2n - 2$   
143 edges or ‘lineages’, and  $\tau: \mathcal{N} \rightarrow \mathbb{R}_{\geq 0}$  defines the time of each node. With  
144 reference to an edge  $(u, v) \in \mathcal{E}$  we say that  $u$  is the ‘direct ancestor’ and  $v$  is  
145 the ‘direct descendant’ and we require  $\tau(u) < \tau(v)$ . Nodes are further  
146 classified into two sets: ‘tips’ (terminal nodes) denoted  $\mathcal{T}$  with no descendants  
147 and internal nodes denoted  $\mathcal{I}$  with exactly two direct descendants. The trees  
148 may be heterochronous, meaning that tips of the tree can represent samples  
149 taken at different time points.

150 For a node  $u \in \mathcal{N}$  we define the clade  $C_u$  to be the set of nodes  
151 descending from  $u$ , that is, the node  $u$  and all  $v \in \mathcal{N}$  such that there is a  
152 directed path of edges from  $u$  to  $v$ . We say that nodes  $v$  in  $C_u$  are ‘descended  
153 from’  $u$ . We will also have occasion to define clades ‘top down’ in terms of a  
154 subset of tips in the tree. For this, we define the most recent common ancestor  
155  $\text{MRCA}(X)$  of a set  $X \subseteq \mathcal{T}$  to be the most recent node  $u$  such that  $X \subseteq C_u$ ,  
156 that is, all other nodes  $v$  with  $X \subseteq C_v$  have  $\tau(v) < \tau(u)$ . Then we let the  
157 top-down clade  $B_X$  be defined as

$$B_X = \{u \in \mathcal{N} \mid C_u \cap X \neq \emptyset\}.$$

158 Note that  $B_X$  includes the tips  $X$  as well as some nodes ancestral to  
159  $\text{MRCA}(X)$ .

160 In general  $B_X \neq C_{\text{MRCA}(X)}$  since  $X$  does not necessarily include all  
161 tips descending from  $\text{MRCA}(X)$ . We will also need to refer to the nodes  
162 corresponding to coalescent events among lineages of the set  $X$  only, excluding  
163 those between lineages of  $X$  and lineages of the complement of  $X$ ,

$$D_X = X \cup \{u \in B_X \mid \exists(u, v), (u, w) \in \mathcal{E}, v \neq w, C_v \cap X \neq \emptyset, C_w \cap X \neq \emptyset\},$$

164 Figure 2A illustrates a tree and the sets  $B_X$ ,  $D_X$ , and  $C_{\text{MRCA}(X)}$ .

165 Since each node has a time, we can define the set of ‘extant’ lineages  
166  $\mathcal{A}(t)$  at a particular time  $t$  to be the set of nodes occurring after time  $t$  with a  
167 direct ancestor before time  $t$ ,

$$\mathcal{A}(t) = \{v \in \mathcal{N} \mid \exists(u, v) \in \mathcal{E}, \tau(u) < t \leq \tau(v)\}.$$

168 We might also refer to the number of extant lineages at time  $t$ ,  $a(t) = |\mathcal{A}(t)|$ ,  
169 and if considering the number of extant lineages within a particular clade  
170 ancestral to (and including)  $X$  we write

$$a_X(t) = |\mathcal{A}(t) \cap B_X|.$$



## 171 Non-parametric test for a given pair of clades

172 With the above notation, the rank-sum statistic can now be defined which will  
173 form the basis for subsequent statistical tests and can be used to compare any  
174 pair of clades in the tree.

175 Let  $X$  and  $Y$  represent disjoint sets of tips as represented in Figure  
176 2B-D. Having sorted the nodes according to time and assigned a corresponding  
177 rank to each internal node, this statistic computes the sum of ranks in a given  
178 clade in comparison to a different clade:

$$\rho(X|Y) = \sum_{i=1}^K i \mathbf{1}_{D_X \setminus D_Y}(w_i), \quad (1)$$

179 where  $S_{X,Y} = (w_1, w_2, \dots, w_K)$  is the sequence of internal nodes in  $D_X \cup D_Y$   
180 sorted by time (present to past), and  $\mathbf{1}_A(u)$  is an indicator that takes the  
181 value 1 if  $u \in A$  and is zero otherwise. Note that  $\rho(X|Y)$  is asymmetric in  $X$   
182 and  $Y$ . Also note that  $\rho(X|Y)$  makes use of  $D_X, D_Y$  and not  $B_X, B_Y$  because  
183 we are interested in the relative ordering of coalescent events among lineages  
184 of  $X$  and  $Y$ . Only the ordering of the events matter, the absolute times are  
185 immaterial to the test.

186 Under a neutral coalescent process, the distribution of coalescent  
187 times in two clades ancestral to  $X$  and  $Y$  will depend on the number of extant  
188 lineages through time in both clades and on the effective population size  $N_e(t)$   
189 (Wakeley 2009). However, the distribution of the relative ordering of  
190 coalescent times only depends on the sizes of the clades. This distribution can  
191 be computed rapidly by Monte-Carlo simulation as shown below, provided  
192 that we know the probability that the next coalescent will be in  $X$  or  $Y$  as a  
193 function of the number of lineages ancestral to  $X$  and  $Y$ , given by  $a_X(t)$  and

194  $a_Y(t)$ . We here provide new theoretical results on the distribution of the  
195 relative ordering of coalescence times under the null hypothesis that both  $B_X$   
196 and  $B_Y$  are clades within a single tree generated by a neutral unstructured  
197 coalescent process. In the following we consider three different scenarios.

198 **Event  $E_1$ .** Suppose that a clade  $B_X$  has a MRCA before any tip of  $X$  shares  
199 a common ancestor with the clade of another set of tips  $Y$ , disjoint to  $X$ .  
200 After lineages in  $X$  have found a common ancestor, the MRCA of  $X$  may or  
201 may not coalesce with lineages in  $B_Y$  before  $Y$  has found a common ancestor.  
202 Figures 2B-C illustrates trees that satisfies this condition. Note that in Figure  
203 2B, a lineage in  $Y$  coalesces with the MRCA of  $X$  before lineages in  $Y$  find a  
204 MRCA and in Figure B, both  $X$  and  $Y$  have a common ancestor before they  
205 find a common ancestor with one another.

217 Observing a taxonomic pattern such as shown in Figures 2B-C is a  
218 random event in a stochastic unstructured coalescent process, and we denote  
219 this event by  $E_1$  (suppressing  $X$  and  $Y$  for convenience). Wiuf and Donnelly  
220 (Wiuf and Donnelly 1999) showed that the probability of observing  $E_1$ , given  
221 the state of the tree at a particular time  $t$ , only depends on the number of  
222 lineages  $z = a_X(t)$  and  $w = a_Y(t)$ ,

$$Q_1(z, w) = \frac{2(z-1)!w!}{(z+w-1)!(z+1)}, \quad z, w \geq 1. \quad (2)$$

223 The numbers of extant lineages in  $B_X$  (or its complement) following  
224 each coalescent event conditional on  $E_1$  is a Markov chain. The transition  
225 probabilities of this chain are exactly those needed to simulate the null  
226 distribution of the test statistic  $\rho(X|Y)$ . The probability that the next  
227 coalescent event is among lineages in the clade  $B_X$  given  $E_1$  (starting at a  
228 particular time  $t$ ) and the current ancestral number of lineages of  $X$ , say  $z$ ,

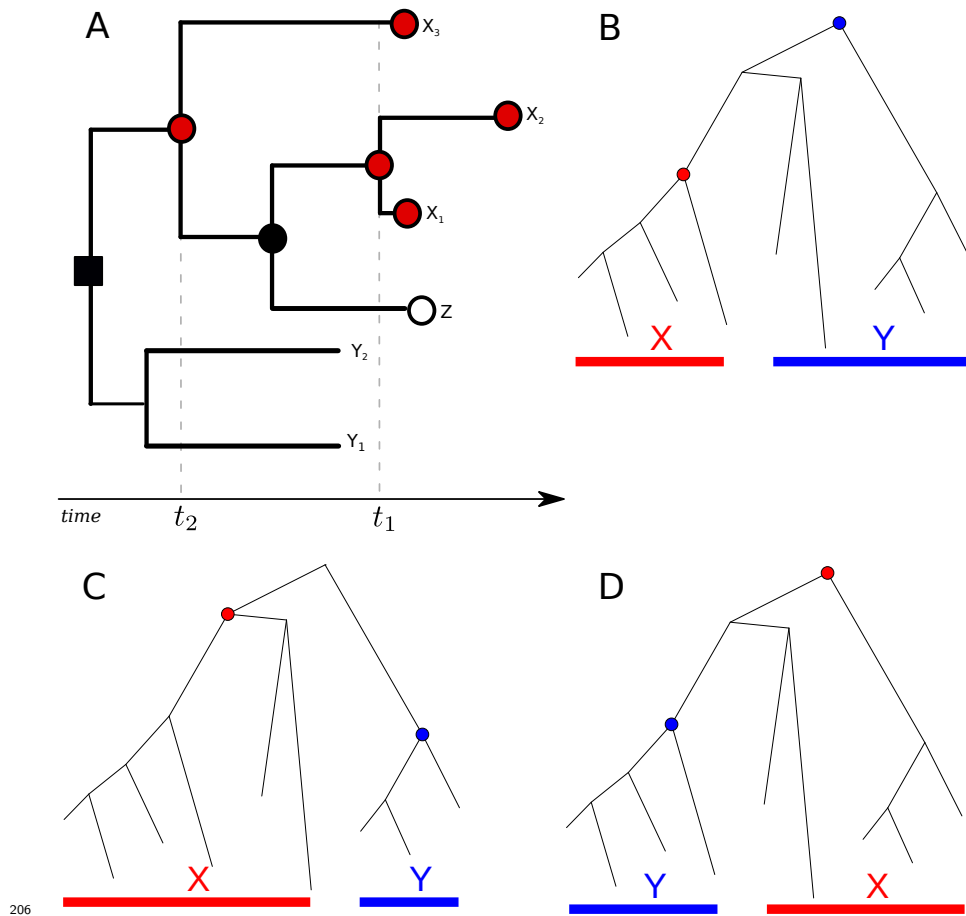

206  
 207 Figure 2: Coalescent trees for illustrating taxonomic relationships and notation  
 208 used throughout the text. In panel A, the shape and colour of nodes correspond  
 209 to variables  $B_X$ ,  $D_X$ , and  $C_{\text{MRCA}(X)}$  in relation to the set of tips  $X =$   
 210  $\{x_1, x_2, x_3\}$ . All circles regardless of colour correspond to  $C_{\text{MRCA}(X)}$ . All filled  
 211 shapes (red or black, square or circle) correspond to  $B_X$ . Note that this includes  
 212 nodes ancestral to the MRCA of  $X$ . All red filled circles correspond to  $D_X$ . Two  
 213 coalescent events occur among nodes in  $D_X$  at times  $t_1$  and  $t_2$ . Panels B-D show  
 214 a coalescent tree and examples of potential taxonomic relationships between two  
 215 clades. Prior knowledge of taxonomic relationships between  $X$  and  $Y$  influences  
 216 the probability that the next coalescent event will be observed in clade  $X$ .

229 and  $Y$ , say  $w$ , was found by Wiuf and Donnelly (Wiuf and Donnelly 1999):

$$(z, w) \mapsto (z - 1, w) \quad \text{with probability} \quad \frac{z + 1}{z + w}. \quad (3)$$

230 **Event  $E_2$ .** We further derive analogous probabilities under slightly different  
231 conditions. Suppose we have disjoint sets of tips,  $X$  and  $Y$ . Let all lineages in  
232  $X$  share a common ancestor before any share a common ancestor with  $Y$  and  
233 vice versa, all lineages in  $Y$  share a common ancestor before any share a  
234 common ancestor with tips in  $X$ . Figure 2C illustrates a tree and two clades  
235 that satisfy this condition, which we denote by  $E_2$ . As before, the number of  
236 ancestors in  $B_X$  and  $B_Y$  will form a Markov chain, conditional on  $E_2$ .

237 The probability that the next coalescent event is among lineages in  
238 the clade  $B_X$  given  $E_2$  at a particular time  $t$  and the current ancestral number  
239 of lineages of  $X$ ,  $z = a_X(t)$ , and  $Y$ ,  $w = a_Y(t)$ , can be given as:

$$(z, w) \mapsto (z - 1, w) \quad \text{with probability} \quad \frac{z - 1}{z + w - 2}, \quad z, w \geq 1. \quad (4)$$

240 To see this, note that without conditioning on  $E_2$ , the probability that  
241 the next coalescent is among ancestral nodes in  $B_X$  is

$$\frac{z(z - 1)}{(z + w)(z + w - 1)}.$$

242 This is simply the ratio of the coalescent rates in  $B_X$ , which is  $\binom{z}{2}/N_e(t)$ , to  
243 the rate in  $B_X \cup B_Y$ , which is  $\binom{z+w}{2}/N_e(t)$ . The effective population size is  
244 homogenous through the tree by hypothesis of the statistical test, and it  
245 cancels out in this ratio. The probability that the coalescent event would be

246 between the clades ancestral to  $X$  and  $Y$  would be

$$\frac{2zw}{(z+w)(z+w-1)}.$$

247 The probability  $Q_2(z, w)$  of the event  $E_2$  must fulfil the recursion,

$$\begin{aligned} (z+w)(z+w-1)Q_2(z, w) \\ = z(z-1)Q_2(z-1, w) + w(w-1)Q_2(z, w-1), \end{aligned} \quad (5)$$

248 where  $z, w \geq 1$ . If there is exactly one lineage in both  $B_X$  and  $B_Y$ , then

249  $Q_2(1, 1) = 1$ . If there is one lineage remaining in  $B_X$  and  $w > 1$  in  $V_Y$ , then

250  $Q_2(1, w)$  is the probability that the next  $w - 1$  coalescent events only occur

251 between lineages in  $B_Y$  and do not include the single lineage ancestral to  $X$ .

252 The probability of the next coalescent event being in  $B_Y$  is the probability of

253 not selecting the  $B_X$  lineage when sampling two extant lineages without

254 replacement:

$$\begin{aligned} Q_2(1, w) &= \prod_{j=2}^w \left( \frac{j}{j+1} \right) \left( \frac{j-1}{j} \right) \\ &= \frac{2}{w(w+1)}, \quad w \geq 1. \end{aligned} \quad (6)$$

255 Similarly,  $Q_2(z, 1) = \frac{2}{z(z+1)}$ ,  $z \geq 1$ . This recursion can be solved explicitly to

256 give

$$Q_2(z, w) = \frac{2z!w!}{(z+w)!(z+w-1)}, \quad z, w \geq 1. \quad (7)$$

257 Now the transition probability (Equation 4) can be defined in terms of the

258 rate of coalescence in  $B_X$  and  $B_Y$  and the probability of  $E_2$  being satisfied

259 following the coalescent event:

$$(z, w) \mapsto (z - 1, w) \quad \text{with probability} \\ \frac{z(z - 1)Q_2(z - 1, w)}{z(z - 1)Q_2(z - 1, w) + w(w - 1)Q_2(z, w - 1)} = \frac{z - 1}{z + w - 2}. \quad (8)$$

260 **Event  $E_3$ .** Finally, we consider an event that is a combination of the scenarios  
 261 described by events  $E_1$  and  $E_2$ . We denote  $E_3$  to be the event that all  $X$  have  
 262 a MRCA before sharing a common ancestor with lineages of  $Y$  and/or *vice*  
 263 *versa*, all lineages in  $Y$  have a MRCA before sharing an ancestor with lineages  
 264 of  $X$ . The trees in Figures 2B-D satisfy this condition.

265 The probability of the event  $E_3$  might be defined in terms of  $Q_1$  and  
 266  $Q_2$  given previously:

$$Q_3(z, w) = Q_1(z, w) + Q_1(w, z) - Q_2(z, w) \\ = \frac{2z!w!}{(z + w - 1)!} \left( \frac{1}{z(z + 1)} + \frac{1}{w(w + 1)} - \frac{1}{(z + w)(z + w - 1)} \right), \quad (9)$$

267 with  $z = a_X(t)$  and  $w = a_Y(t)$  being sample sizes at a particular time  $t$ , as

268 before. Note that  $Q_2$  is subtracted once in this equation because the

269 taxonomic relationship described by  $E_2$  is already included in  $E_1$ . The

270 function  $Q_3$  satisfies the same recursion as above (Equation 5) with slightly

271 different boundary conditions:

$$Q_3(1, w) = Q_3(z, 1) = 1, \quad z, w \geq 1.$$

272 Transition probabilities can be derived as above by substituting  $Q_3$  for  $Q_2$  in

273 Equation 8. The probability that the next coalescent event is among lineages

274 in  $D_X$  conditional on  $E_3$  is

$$(z, w) \mapsto (z - 1, w) \quad \text{with probability} \quad \frac{(z - 1)R_{z-1,w}}{(z - 1)R_{z-1,w} + (w - 1)R_{w,z-1}}, \quad (10)$$

where

$$R_{z,w} = \frac{1}{z(z+1)} + \frac{1}{w(w+1)} - \frac{1}{(z+w)(z+w-1)}, \quad z, w \geq 1. \quad (11)$$

## 275 **Algorithms for detecting population structure**

276 The null distribution of the test statistic  $\rho(X, Y)$  can be computed by  
277 Monte-Carlo simulation using Equations 3, 4 or 10 depending on the  
278 taxonomic constraints to be conditioned on. This can be computed given any  
279 pair of disjoint clades  $X$  and  $Y$ . Algorithm 1 in the Supporting Information  
280 provides the simulation procedure for computing the two-sided p-values of an  
281 empirical measurement  $\hat{R} = \rho(X, Y)$ , and we denote these p-values  $\xi(X, Y, R)$ .  
282 The algorithm works by simulating many replicates of the rank-sum statistic  
283 conditional on the sets  $X, Y$ , and the taxonomic relationship between these  
284 clades. Furthermore, the order of sampling events and coalescent events is part  
285 of the data within a time-scaled phylogeny. Thus the simulation procedure  
286 does not simulate coalescent trees per se, but rather the number of lineages  
287 through time  $a_X(t)$  and  $a_Y(t)$  by proceeding from the most recent sample back  
288 to the MRCA of clades  $X$  and  $Y$ . Upon visiting a node in the ordered  
289 sequence of coalescent events, the algorithm selects at random a clade  $D_X$  or  
290  $D_Y$  for this event using the transition probabilities from Equations 3, 4 or 10.  
291 Upon visiting a coalescent event,  $a_X(t)$  or  $a_Y(t)$  is incremented using the  
292 observed clade membership of the sample at that time. The end result of of  
293 this simulation procedure is a large set of replicate rank-sum statistics which  
294 serves as a null distribution for comparison with the value computed from the

295 time-scaled phylogeny.

296           While in principle this test allows comparison of any pair of disjoint  
297 clades, the number of possible comparisons is vast, and deriving a useful  
298 summary of taxonomic structure requires additional heuristic algorithms.  
299 These algorithms are designed to stratify clades into self-similar sets and to do  
300 so in a computationally efficient manner. Algorithm 2 in the Supporting  
301 Information identifies ‘cladistic outliers’, which are clades that have a  
302 coalescent pattern that is different from the remainder of the tree. It performs  
303 a single pre-order traversal of the tree and greedily adds clades to the partition  
304 with the most outlying values of the test statistic. At each node  $u$  visited in  
305 pre-order traversal, Algorithm 2 examines all descendants  $v$  in  $C_u$  and  
306 compares  $C_v$  with to  $C_u \setminus C_v$ . If no outliers are found, the algorithm will desist  
307 from searching  $C_u$  and the set of tips  $C_u \cap \mathcal{T}$  will be added to the partition. If  
308 at least one outlier is found in  $C_u$ , a search will begin on the biggest outlier  
309 (smallest p-value computed using Algorithm 1). The final result of this  
310 algorithm is a partition of  $m$  non-overlapping clades  $M = \{X_1, \dots, X_m\}$ .

311           In practice, it is often desirable to not compare very small clades  
312 against one another or much larger clades, so additional parameters are  
313 available to desist the pre-order traversal upon reaching a clade with few  
314 descendants. It is also often of practical interest to only compare clades that  
315 overlap in time to a significant extent, so yet another parameter is available to  
316 desist from comparing a pair of clades if few lineages in the pair ever coexist at  
317 any time.

318           Additional algorithms are required to detect polyphyletic relationships  
319 as depicted in Figure 1 which arise if, for example, distantly related lineages  
320 colonise the same area and have similar population dynamics or if  
321 near-identical fitness-enhancing mutations occur independently on different



322 lineages. Figure 1 depicts two distantly related clades (yellow and red) with  
323 similar population dynamics, and it is desirable to classify these as a single  
324 deme based on shared population dynamic history. Algorithm 2 will partition  
325 tips of the tree into distinct clades with monophyletic or paraphyletic  
326 relationships, however an approach based on pre-order traversal of the tree can  
327 not on its own arrive at a polyphyletic partition of the tree. Therefore we can  
328 implement a final hierarchical clustering step in order to group similar clades  
329 as follows:

- 330 1. For each distinct pair of clades  $X$  and  $Y$  in partition  $M$ , compute  
331  $q_{XY} = \xi(X, Y, \hat{R}_{XY})$ .
- 332 2. Convert the p-value into a measure of distance between all clades:  
333  $d_{XY} = |F^{-1}(q_{XY})|$ , where  $F^{-1}$  is the inverse Gaussian cumulative  
334 distribution function (quantile function). Set  $d_{XX} = 0$  for all  $X$ .
- 335 3. Perform a conventional hierarchical clustering using a threshold distance  
336  $F^{-1}(1 - \alpha/2)$  for confidence level  $\alpha$ . Various clustering algorithms can  
337 be used at this point, and our software has implemented the ‘complete  
338 linkage’ algorithm (Everitt et al. 2001).

339 Algorithms 1 and 2 as well as the final hierarchical clustering step are  
340 implemented as an open source R package called *treestructure* available at  
341 <https://github.com/emvolz-phylogenetics/treestructure>. The R  
342 package supports parallelisation and includes facilities for tree visualisation  
343 using the *ggtree* package (Yu et al. 2017). The package provides convenience  
344 functions to output cluster and partition assignment for downstream statistical  
345 analysis in R.

## 346 **Simulation studies**

347 To evaluate the potential for *treestructure* to detect outbreaks we applied the  
348 new method to phylogenies estimated from newly simulated data using a  
349 structured coalescent model, as well as previously published simulation data  
350 based on a discrete-event branching process (McCloskey and Poon 2017).

351 The structured coalescent simulation was based on a model with two  
352 demes: a large deme with constant effective population size and a smaller  
353 deme which grows exponentially up to the time of sampling. Migration occurs  
354 at a constant rate in both directions between the growing and constant-size  
355 demes, and equal proportions of these two demes are sampled. Coalescent  
356 simulations were implemented using the *phydynR* package  
357 <http://github.com/emvolz-phylogenomics/phydynR>. All genealogies  
358 simulated from this model were comprised of 1000 tips with 200 of these  
359 sampled from the growing deme. Each of 100 simulations were based on  
360 different parameters such that there was a spectrum of difficulty identifying  
361 population structure from the trees. The sample proportion was chosen  
362 uniformly between 5% and 75% and, the growth rate in the growing deme was  
363 chosen uniformly between 5% and 100% per year. Bidirectional migration  
364 between demes was fixed at 5% per year. While most tips were sampled at a  
365 single time point, 50 tips from the constant-size deme were distributed  
366 uniformly through time in order to facilitate molecular clock dating. Multiple  
367 sequence alignments were simulated based on trees using seq-gen (Rambaut  
368 and Grass 1997). Each sequence comprised 1000 nucleotides from a HKY  
369 model with a substitution rate of  $10^{-3}$  per site per year. A neighbour joining  
370 tree was estimated from each alignment and dated phylogenies estimated using  
371 the *treedater* R package (Volz and Frost 2017) with a strict molecular clock.  
372 The *treestructure* algorithm was applied to each phylogeny using the default

373  $\alpha = 1\%$  threshold.

374           Previously, McCloskey et al. simulated 100 genealogies from a  
375 discrete-event birth-death process (McCloskey and Poon 2017; Vaughan and  
376 Drummond 2013). These simulations were based on a process with  
377 heterogeneous classes of individuals with different birth rates. With some  
378 probability, lineages migrate to a class with higher birth rates. This could  
379 represent a generic outbreak scenario such as a set of individuals with higher  
380 risk behaviour or other exposures. In a separate set of simulations, the  
381 outbreak population differs from the main population along multiple  
382 dimensions: the birth rate and the sampling rate are both increased by a  
383 common factor ( $5\times$ ). 100 genealogies were simulated under both scenarios and  
384 the *treestructure* algorithm was applied to each. To create more challenging  
385 conditions for the method and to evaluate the sensitivity of the method to  
386 sample coverage, we also applied the method to genealogies based on  
387 subsampled lineages with a frequency of 25%. Complete descriptions of  
388 parameters and simulation methods can be found in (McCloskey and Poon  
389 2017).

390           The performance of *treestructure* was evaluated using the normalised  
391 mutual information (NMI) statistic and adjusted Rand index (ARI) computed  
392 using the *aricode* R package <https://github.com/jchiquet/aricode> (Vinh  
393 et al. 2010). Both statistics quantify the strength of association between the  
394 estimated and actual structure of the tree, with larger values corresponding to  
395 higher quality reconstructions.

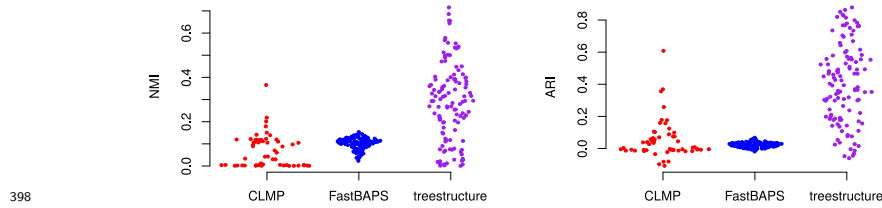

399 Figure 3: The normalised mutual information (NMI) and adjusted Rand index  
400 (ARI) as a function of classifications from several tree-partitioning algorithms  
401 and membership of lineages in outbreaks or a constant-size reservoir. Each point  
402 corresponds to a structured coalescent simulation where 20% of tips are sampled  
403 from an exponentially growing outbreak.

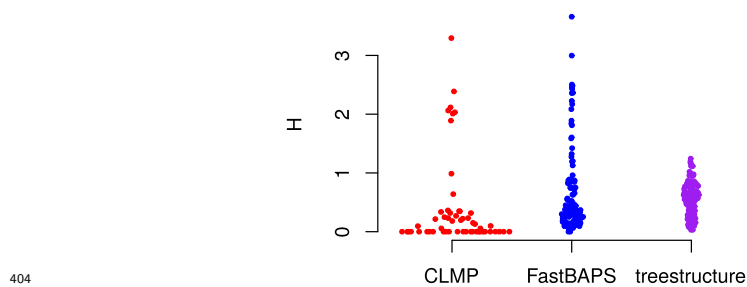

405 Figure 4: Entropy ( $H$ ) of classification from several tree partitioning algorithms  
406 applied to the structured coalescent simulations but only counting lineages  
407 sampled from the exponentially growing outbreak.

## 396 Results

### 397 Simulation studies

408 The *treestructure* algorithm achieves relatively high fidelity of classifications in  
409 comparison to other methods in the structured coalescent simulations which  
410 included 20% of samples from a rapidly growing outbreak. Figure 3 compares  
411 three methods according to the NMI and ARI statistics. In these figures, the  
412 partition of the tree computed by each method is compared to the true  
413 membership of each sampled lineage in outbreak or in the constant-size  
414 reservoir population. Across 100 simulations, *treestructure* has mean ARI of  
415 41% (IQR: 20-57%). The FastBAPS method (Tonkin-Hill et al. 2019) has  
416 mean ARI of 2.3% (IQR:1.2-3.3%) and the CLMP method (McCloskey and  
417 Poon 2017) has mean ARI 5.2% (IQR:-1-7.5%).

418 The relatively lower performance of CLMP and FastBAPS in these  
419 comparisons is largely a consequence of false-positive partitioning of samples  
420 from the reservoir population, but CLMP and FastBAPS usually correctly  
421 identify a clade that closely corresponds to the outbreak. In contrast, the  
422 *treestructure* method seldom sub-divides clades from the reservoir. Figure 4  
423 compares the entropy of partition assignments only within lineages sampled  
424 from the outbreak. This shows that all methods are assigning outbreak  
425 lineages to a small number of partitions and no method is clearly superior by  
426 this metric. The CLMP method has the lowest entropy (mean 40%) but also  
427 several large outliers. *treestructure* has higher entropy (mean 57%) but few  
428 outliers, and FastBAPS is intermediate.

429 The performance of all methods depended on the sample density and  
430 growth rate of the outbreak. Fast growing outbreaks are easier to detect by all  
431 methods but the role of sample density is more ambiguous. The Pearson  
432 correlation of ARI with growth rate is  $\rho = 53\%$ ,  $27\%$ ,  $71\%$  for *treestructure*,

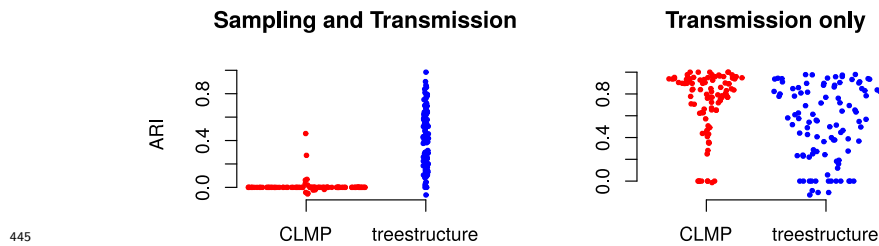

446 Figure 5: The adjusted Rand index for 100 previously published simulations  
447 (McCloskey and Poon 2017). This describes accuracy of classification of tips  
448 into outbreaks using the *treestructure* method and CLMP. Results on left were  
449 based on simulations where both transmission and sampling rates varied in the  
450 outbreak cluster, whereas simulations on the right only allowed transmission  
451 rates to vary.

433 CLMP and FastBAPS respectively. Not all methods are equally sensitive to  
434 these parameters however and FastBAPS is especially sensitive to growth and  
435 sample density. The growth rate and sample density collectively explain 41%,  
436 28% and 60% of variance of ARI in *treestructure*, CLMP and FastBAPS  
437 respectively.

438 We also performed analyses with Phydelity (Han et al. 2018) (results  
439 not shown), a recently proposed method for transmission cluster identification.  
440 This tended to generate a very large number of clusters, both within and  
441 outside of the outbreak demes, reflecting a different emphasis of this method  
442 on finding closely related clusters rather than addressing differences in  
443 macro-level population structure. Thus, results with Phydelity and other  
444 clustering methods were not easily comparable to *treestructure*.

452 Figure 5 shows performance of *treestructure* on previously published  
453 tree simulations (McCloskey and Poon 2017). These simulations differ from  
454 the structured coalescent simulations because both the reservoir and outbreak  
455 demes are growing exponentially at different rates. The birth rate in the

456 outbreak deme is 5-fold the birth rate in the reservoir, but in one set of  
457 simulations, both the birth rate and sampling rate in the outbreak was also  
458 increased 5-fold. In these simulations, the performance of *treestructure*  
459 (median ARI 56%) is slightly lower than the CLMP method (McCloskey and  
460 Poon 2017) (median ARI 83%) when only the birth-rate differs in the  
461 outbreak deme. However *treestructure* maintains good performance when  
462 death and sampling rates also differ. In that case, *treestructure* has median  
463 ARI 42% and CLMP has median ARI 0%. The difficulty of detecting  
464 outbreaks with different sampling patterns was previously highlighted as a  
465 challenge for CLMP (McCloskey and Poon 2017).

#### 466 **Clonal expansion of drug-resistant *N. gonorrhoeae***

467 We examined the role of evolution of antimicrobial resistance in shaping the  
468 phylogenetic structure of *N. gonorrhoeae* using 1102 previously described  
469 whole genome sequences (Grad et al. 2016). These isolates were collected from  
470 multiple sites in the United States between 2000 and 2013 and featured clonal  
471 expansion of lineages with antibiotic resistance to different classes of  
472 antibiotics. We estimated a maximum likelihood tree using *PhyML* (Guindon  
473 et al. 2010) and corrected for the distorting effect of recombination using  
474 *ClonalFrameML* (Didelot and Wilson 2015). We estimated a rooted  
475 time-scaled phylogeny using *treedater* (Volz and Frost 2017). A relaxed clock  
476 model was inferred, with a mean rate of  $4.6 \times 10^{-6}$  substitutions per site per  
477 year. *BactDating* (Didelot et al. 2018) was also applied for the same purpose  
478 and found to give very similar estimates for the clock rate and dating of clades.

479 We focus on the origin and expansion of two clades which  
480 independently developed resistance to cefixime (CFX) by acquiring the mosaic  
481 *penA* XXXIV allele (Grad et al. 2016). These clades are indicated in Figure 6.

482 Note, however, that the level of susceptibility to CFX varies, particularly in  
483 the larger of these two clades. In one lineage within this clade, the mosaic  
484 *penA* XXXIV allele was replaced by recombination with an allele associated  
485 with susceptibility. Other isolates within this clade gained mutations that  
486 further modified the extent of resistance. The larger of these two clades  
487 emerged on a genomic background that is resistant to ciprofloxacin (CIP), so  
488 that it has reduced susceptibility to both CIP and CFX. The smaller of the  
489 two clades is resistant to CFX but not CIP. We therefore extracted a tree with  
490 just 576 tips, representing the genomes from these two CFX-resistant clades as  
491 well as genomes from the two clades that are most closely related to the two  
492 CFX-resistant clades. The output of *treestructure* is shown in Figure 6, using  
493 unique colours to highlight each of the 11 clusters that were identified with  
494  $\alpha = 1\%$ . The clusters reported by *treestructure* are highly correlated with  
495 CFX resistance. Among all distinct pairs of sampled isolates, 84% share the  
496 same resistance profile and cluster membership.

497         We compared *treestructure* with a different method for detecting  
498 community structure, FastBAPS (Tonkin-Hill et al. 2019), since BAPS models  
499 are often applied to bacterial pathogens. We applied FastBAPS using the  
500 same time-scaled phylogeny described previously and using a trimmed  
501 sequence alignment consisting of 38830 polymorphic sites and removing sites  
502 with many gaps. This produced a similar partition of the tree (Figure S2)  
503 with a few differences: FastBAPS clusters overlap exactly with the clade  
504 featuring dual resistance (CIP and CFX), whereas *treestructure* classified a  
505 small number of deep-splitting lineages into a different cluster. Note however  
506 that this behaviour is not necessarily problematic, and may represent a  
507 progressive increase in fitness following the acquisition of resistance through  
508 the evolution of compensatory mutations (Didelot et al. 2016). On the other



509 hand, FastBAPS failed to identify the smaller clade with resistance to CFX  
510 and not CIP and instead grouped that clade with its drug-sensitive sister  
511 clade. In general, *treestructure* found many more clusters within the sister  
512 clades and FastBAPS tended to group these together. We also applied the  
513 much more computationally intensive RhierBAPS method (Tonkin-Hill et al.  
514 2018), and obtained almost identical results to FastBAPS. Overall, BAPS  
515 methods appear to give greater weight to long internal branches when  
516 identifying clusters than *treestructure*.

## 523 **Epidemiological transmission patterns of HIV-1**

524 We reanalysed a time-scaled phylogeny reconstructed from 2068 partial *pol*  
525 HIV-1 subtype B sequences collected from Tennessee between 2001 and 2015  
526 (Dennis et al. 2018). Each lineage within this phylogeny corresponds to a  
527 single HIV patient sampled at a single time point, and various clinical and  
528 demographic covariate data concerning these patients can be associated with  
529 each lineage. In the original study, these sequence data were used to show high  
530 rates of transmission among young (age < 26.4) men who have sex with men  
531 (MSM) (Dennis et al. 2018). Clustering by threshold genetic distance is often  
532 used in HIV epidemiology (Dennis et al. 2014) and indicated that young white  
533 MSM had the highest odds of clustering.

534 We applied the *treestructure* algorithm with default settings to the  
535 time-scaled tree which yielded ten partitions with sizes ranging from 58 to 398.  
536 The tree and partitions are shown in Figure 7 where partitions are labeled  
537 according to the median year of birth among patients in each partition. Many  
538 of these partitions were polyphyletic, suggesting possible multiple importations  
539 of lineages to specific risk groups. We then compared the estimated partition  
540 of the tree with patient covariates. A particular partition stands out along

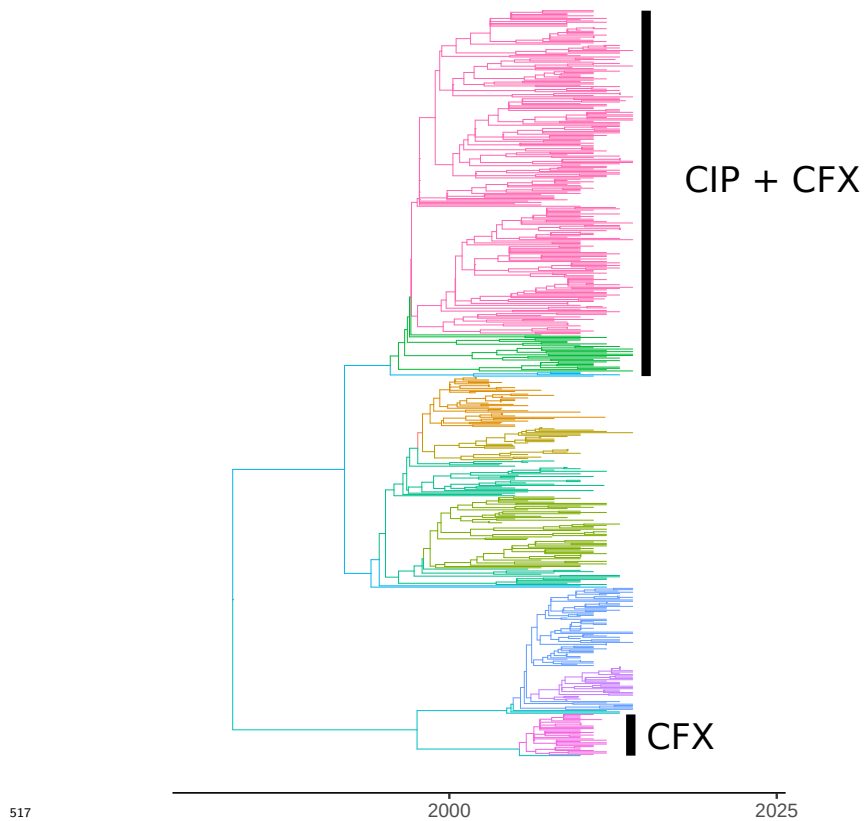

517

518 Figure 6: A time-scaled phylogeny based on 576 whole genomes of *N.*  
519 *gonorrhoeae*, comprising two clades with reduced susceptibility to cefixime  
520 (CFX) and their two sister clades. The top clade also has resistance to  
521 ciprofloxacin (CIP). Different colours on the tree represent the partition detected  
522 using the *treestructure* algorithm.

541 multiple dimensions: it is the smallest (size 58), polyphyletic, arose in the  
542 recent past, and is characterised by very young MSM. The median year of  
543 birth in this partition is 1987, in stark contrast to the rest of the sample with  
544 year of birth in the 1970s. Clades within this young partition are also nested  
545 paraphyletically under other relatively young partitions (cf. Figure 7).

546 We did not find a significant association between the tree partition  
547 and residential postal codes (Tukey analysis of variance,  $p = 0.097$ ). This is in  
548 agreement with the original study which found minimal impact of geography  
549 on genetic clustering in this sample, however this is largely a consequence of  
550 the highly concentrated nature of the sample around Nashville. The ethnicity  
551 of patients (black, white, and other) was strongly associated with the  
552 estimated partition. Black MSM were strongly concentrated in the 1987  
553 partition in particular (83% in contrast to 26-38% in all other partitions). The  
554 odds ratio of black ethnicity given membership in the 1987 partition was 9.7  
555 (95% CI:5.2-19.8).

562 Finally, we applied phylodynamic analysis methods to see if the  
563 partition structure supported the previously published findings that young  
564 MSM were transmitting at a higher rate (Dennis et al. 2018). To estimate  $N_e$   
565 through time, we used the nonparametric *skygrowth* R package (Volz and  
566 Didelot 2018). We estimated  $N_e(t)$  for each partition individually using a  
567 range of precision parameters which control the smoothness ( $\tau$ ) of the  
568 estimated trajectories since we lack a priori information about volatility of  
569 these trajectories. Figure 8 shows  $N_e(t)$  for each partition with  $\tau = 10$  and  
570 supporting Figures S3 and S4 show results using different values of  $\tau$ . The  
571 1987 partition again stands out as the only group which shows evidence of  
572 recent and rapid population growth. Less dramatic recent periods of growth  
573 are also noticeable for other partitions with young patients. The current

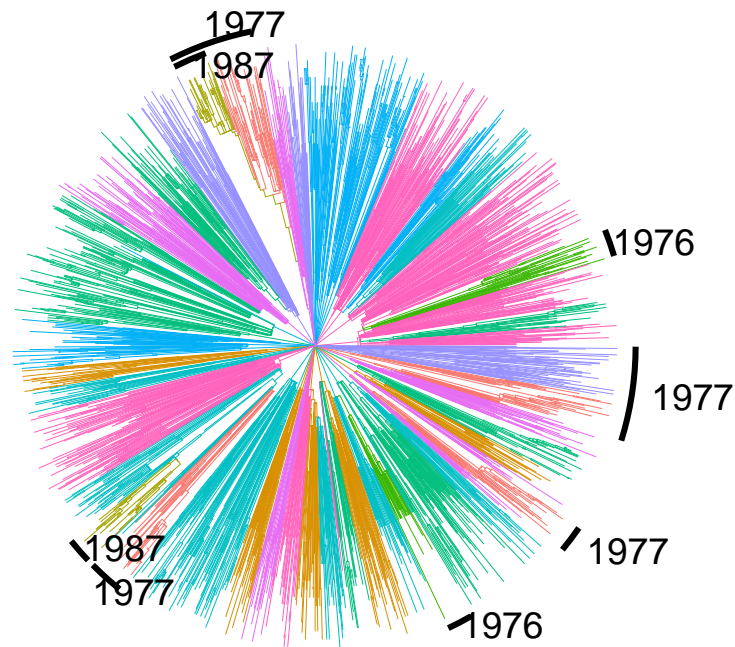

556

557 Figure 7: A time-scaled phylogeny estimated from HIV-1 *pol* sequences in  
558 Tennessee (Dennis et al. 2018). The colours correspond to the ten partitions  
559 identified using the *treestructure* algorithm. Several partitions are annotated  
560 with the median year of birth of HIV patients from whom sequences were  
561 sampled. Partitions lacking annotation had years of birth 1969-1972.

574 exponential growth in the 1987 partition is not consistent across all analyses,  
575 but when  $\tau < 10$  we find  $N_e(t)$  drops precipitously in 2014-2015 (Figure S3).  
576 However, this could also be an artefact of non-random sampling and inclusion  
577 of transmission pairs within the sample.

583           This analysis supports the hypothesis that there has been a recent and  
584 rapid rise of HIV transmissions among young MSM in Tennessee and in  
585 particular among young black MSM. This interpretation is mostly in  
586 agreement with the original study (Dennis et al. 2018), but we find that black  
587 MSM are a group at greater risk than young white MSM.

## 588 Discussion

589 Contrasting the distribution of ordering of nodes provides a natural criterion  
590 for distinguishing clades within a time-scaled phylogeny which are shaped by  
591 different evolutionary or demographic processes. The non-parametric nature of  
592 this classification method imposes minimal assumptions on the mechanisms  
593 that generate phylogenetic patterns. Thus, we have found this method  
594 maintains good performance over a diverse range of situations where  
595 phylogenetic structure is produced, including differential transmission rates,  
596 epidemiological outbreaks, evolution of beneficial mutations, and differential  
597 sampling patterns. Our work is related to the research on species delimitation  
598 methods (see for example (Zhang et al. 2013)) although targeted at  
599 within-species variation, and is also related to recent work on methods for  
600 detecting co-diversification of species(Oaks et al. 2019). This method appears  
601 relatively robust compared to other methods against false-positive  
602 identification of phylogenetic structure, but nevertheless has good sensitivity  
603 for detecting structure in most situations.

604           There are many immediate applications of this method in the area of

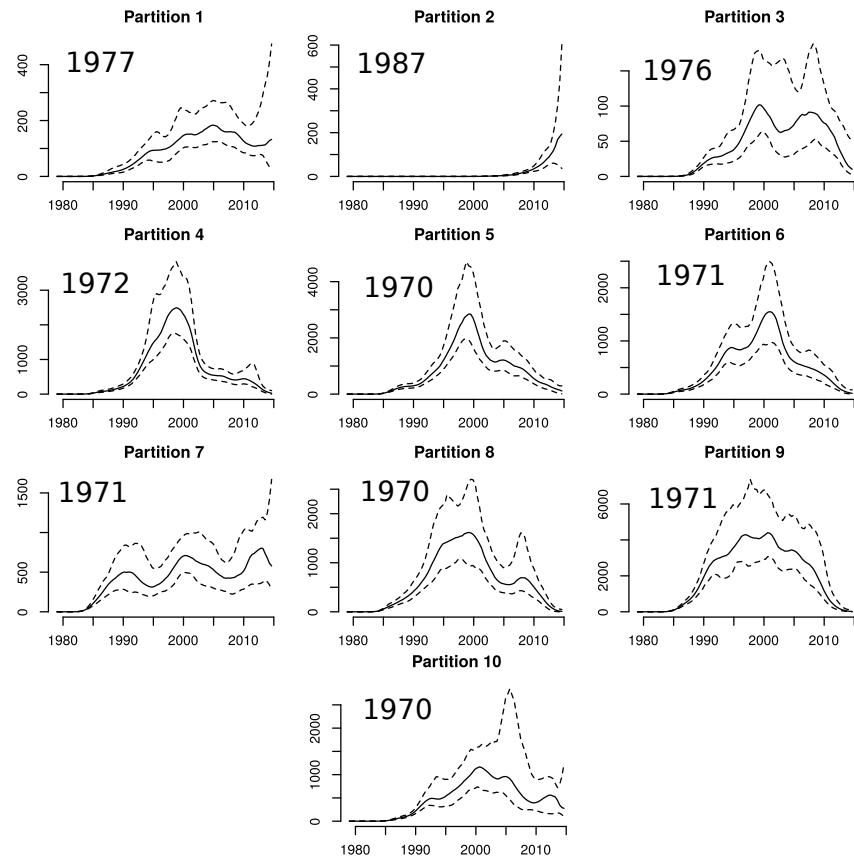

578

579 Figure 8: Estimated effective population size through time for each partition in  
580 the Tennessee HIV-1 phylogeny. Each panel is annotated with the median year  
581 of birth among HIV patients in each partition.  $N_e(t)$  was estimated using the  
582 *skygrowth* method (Volz and Didelot 2018) with precision parameter  $\tau = 10$ .

605 pathogen evolution where time-scaled phylogenetics is increasingly used in  
606 epidemiological investigations (Biek et al. 2015). We have demonstrated the  
607 role of natural selection in shaping phylogenetic structure of *N. gonorrhoeae*,  
608 and our method clearly identifies clades which expanded in the recent past due  
609 to acquisition of antimicrobial resistance. We have demonstrated the role of  
610 human demography and transmission patterns in shaping the evolution of  
611 HIV-1, and our method has shown distinct outbreaks of HIV-1 in specific  
612 groups defined by age, race, and behaviour. Furthermore, we have shown how  
613 clades detected by this method can be analysed using phylodynamic methods  
614 that can yield additional insights into recent outbreaks or the mechanisms  
615 which generated phylogenetic structure. For example, we have applied  
616 non-parametric methods to estimate the effective population size through time  
617 in HIV outbreaks detected using *treestructure* which highlighted particular  
618 groups that appear to be at higher risk of transmission. Such analyses would  
619 be more problematic using other partitioning or clustering algorithms because  
620 phylogenetic clusters can appear by chance in homogeneous populations of  
621 neutrally evolving pathogens, and this can give the false appearance of recent  
622 growth (Dearlove et al. 2017). This application of phylodynamics analysis  
623 methods is possible because the statistical test used in *treestructure* provides  
624 theoretical justification for treating each partition as a separate unstructured  
625 population.

626         Applications of the *treestructure* algorithms are scalable to relatively  
627 large phylogenies. The main algorithms require only a single pre-order  
628 traversal of the tree and all of the computations presented here required less  
629 than one minute to run. The method is based on a time-scaled phylogeny, and  
630 the computational burden of this preliminary step is typically higher than that  
631 of running *treestructure*, even though significant progress has been made

632 recently is this area (Volz and Frost 2017; Didelot et al. 2018; Sagulenko et al.  
633 2018; Tamura et al. 2018; Miura et al. 2019). Future developments of  
634 *treestructure* and other methods post-processing time-scaled phylogenies (Volz  
635 and Didelot 2018; Didelot et al. 2017) should address the uncertainty in the  
636 input phylogeny, for example by accounting for bootstrap or Bayesian support  
637 values for phylogenetic splits, or by summarising results from multiple trees.

638 **Funding.** Research reported in this publication was supported by the  
639 National Institute of Allergy and Infectious Diseases of the National Institutes  
640 of Health under Award Number R01-AI135970 (EV, AD, SDWF). EV and XD  
641 acknowledge funding from the UK Medical Research Council (MR/R015600/1)  
642 and the National Institute for Health Research (NIHR) Health Protection  
643 Research Unit in Modelling Methodology (HPRU-2012-10080). SDWF was  
644 also supported in part by The Alan Turing Institute via an Engineering and  
645 Physical Sciences Research Council Grant (EP/510129/1).

## 646 References

- 647 Beugin, M. P., T. Gayet, D. Pontier, S. Devillard, and T. Jombart. 2018. A  
648 fast likelihood solution to the genetic clustering problem. *Methods Ecol.*  
649 *Evol.* 9:1006–1016.
- 650 Biek, R., O. G. Pybus, J. O. Lloyd-Smith, and X. Didelot. 2015. Measurably  
651 evolving pathogens in the genomic era. *Trends Ecol. Evol.* 30:306–313.
- 652 Bouckaert, R., J. Heled, D. Kühnert, T. Vaughan, C.-H. Wu, D. Xie, M. A.  
653 Suchard, A. Rambaut, and A. J. Drummond. 2014. Beast 2: a software  
654 platform for bayesian evolutionary analysis. *PLoS Comput. Biol.*  
655 10:e1003537.
- 656 De Maio, N., C. J. Worby, D. J. Wilson, and N. Stoesser. 2018. Bayesian



- 657 reconstruction of transmission within outbreaks using genomic variants.  
658 PLoS Comput. Biol. 14:e1006117.
- 659 Dearlove, B. L. and S. D. W. Frost. 2015. Measuring Asymmetry in  
660 Time-Stamped Phylogenies. PLoS Comput. Biol. 11:e1004312.
- 661 Dearlove, B. L., F. Xiang, and S. D. Frost. 2017. Biased phylodynamic  
662 inferences from analysing clusters of viral sequences. *Virus Evolution* 3.
- 663 Dennis, A. M., J. T. Herbeck, A. L. Brown, P. Kellam, T. de Oliveira,  
664 D. Pillay, C. Fraser, and M. S. Cohen. 2014. Phylogenetic studies of  
665 transmission dynamics in generalized HIV epidemics: an essential tool where  
666 the burden is greatest? *J. Acquir. Immune Defic. Syndr.* 67:181–195.
- 667 Dennis, A. M., E. Volz, S. D. Frost, M. Hossain, A. F. Poon, P. F. Rebeiro,  
668 S. H. Vermund, T. R. Sterling, and M. L. Kalish. 2018. Hiv-1 transmission  
669 clustering and phylodynamics highlight the important role of young men  
670 who have sex with men. *AIDS Research and Human Retroviruses*  
671 34:879–888.
- 672 Didelot, X., N. J. Croucher, S. D. Bentley, S. R. Harris, and D. J. Wilson.  
673 2018. Bayesian inference of ancestral dates on bacterial phylogenetic trees.  
674 *Nucleic Acids Res.* 46:e134.
- 675 Didelot, X., C. Fraser, J. Gardy, and C. Colijn. 2017. Genomic infectious  
676 disease epidemiology in partially sampled and ongoing outbreaks. *Mol. Biol.*  
677 *Evol.* 34:997–1007.
- 678 Didelot, X., A. S. Walker, T. E. Peto, D. W. Crook, and D. J. Wilson. 2016.  
679 Within-host evolution of bacterial pathogens. *Nat. Rev. Microbiol.*  
680 14:150–162.

- 681 Didelot, X. and D. J. Wilson. 2015. ClonalFrameML: Efficient Inference of  
682 Recombination in Whole Bacterial Genomes. *PLoS Comput. Biol.*  
683 11:e1004041.
- 684 Dudas, G., L. M. Carvalho, T. Bedford, A. J. Tatem, G. Baele, N. R. Faria,  
685 D. J. Park, J. T. Ladner, A. Arias, D. Asogun, F. Bielejec, S. L. Caddy,  
686 M. Cotten, J. D'Ambrozio, S. Dellicour, A. Di Caro, J. W. Diclaro,  
687 S. Duraffour, M. J. Elmore, L. S. Fakoli, O. Faye, M. L. Gilbert, S. M.  
688 Gevao, S. Gire, A. Gladden-Young, A. Gnirke, A. Goba, D. S. Grant, B. L.  
689 Haagmans, J. A. Hiscox, U. Jah, J. R. Kugelman, D. Liu, J. Lu, C. M.  
690 Malboeuf, S. Mate, D. A. Matthews, C. B. Matranga, L. W. Meredith,  
691 J. Qu, J. Quick, S. D. Pas, M. V. T. Phan, G. Pollakis, C. B. Reusken,  
692 M. Sanchez-Lockhart, S. F. Schaffner, J. S. Schieffelin, R. S. Sealfon,  
693 E. Simon-Loriere, S. L. Smits, K. Stoecker, L. Thorne, E. A. Tobin, M. A.  
694 Vandi, S. J. Watson, K. West, S. Whitmer, M. R. Wiley, S. M. Winnicki,  
695 S. Wohl, R. Wölfel, N. L. Yozwiak, K. G. Andersen, S. O. Blyden, F. Bolay,  
696 M. W. Carroll, B. Dahn, B. Diallo, P. Formenty, C. Fraser, G. F. Gao, R. F.  
697 Garry, I. Goodfellow, S. Günther, C. T. Happi, E. C. Holmes, B. Kargbo,  
698 S. Keita, P. Kellam, M. P. G. Koopmans, J. H. Kuhn, N. J. Loman,  
699 N. Magassouba, D. Naidoo, S. T. Nichol, T. Nyenswah, G. Palacios, O. G.  
700 Pybus, P. C. Sabeti, A. Sall, U. Ströher, I. Wurie, M. A. Suchard, P. Lemey,  
701 and A. Rambaut. 2017. Virus genomes reveal factors that spread and  
702 sustained the ebola epidemic. *Nature* 544:309–315.
- 703 Everitt, B., S. Landau, and M. Leese. 2001. *Cluster Analysis*. Wiley New York.
- 704
- 705 Eyre, D. W., T. Golubchik, N. C. Gordon, R. Bowden, P. Piazza, E. M. Batty,  
706 C. L. C. Ip, D. J. Wilson, X. Didelot, L. O'Connor, R. Lay, D. Buck, A. M.  
707 Kearns, A. Shaw, J. Paul, M. H. Wilcox, P. J. Donnelly, T. E. A. Peto, A. S.

- 708 Walker, and D. W. Crook. 2012. A pilot study of rapid benchtop sequencing  
709 of *Staphylococcus aureus* and *Clostridium difficile* for outbreak detection  
710 and surveillance. *BMJ Open* 2:e001124.
- 711 Grad, Y. H., S. R. Harris, R. D. Kirkcaldy, A. G. Green, D. S. Marks, S. D.  
712 Bentley, D. Trees, and M. Lipsitch. 2016. Genomic epidemiology of  
713 gonococcal resistance to extended-spectrum cephalosporins, macrolides, and  
714 fluoroquinolones in the united states, 2000–2013. *The Journal of Infectious*  
715 *Diseases* 214:1579–1587.
- 716 Guindon, S., J.-F. Dufayard, V. Lefort, M. Anisimova, W. Hordijk, and  
717 O. Gascuel. 2010. New algorithms and methods to estimate  
718 maximum-likelihood phylogenies: assessing the performance of PhyML 3.0.  
719 *Systematic Biology* 59:307–21.
- 720 Han, A., E. Parker, S. Maurer-Stroh, and C. Russell. 2018. Inferring putative  
721 transmission clusters with phydelity. bioRxiv Page 477653.
- 722 Hartl, D. L., A. G. Clark, and A. G. Clark. 1997. Principles of population  
723 genetics vol. 116. Sinauer associates Sunderland, MA.
- 724 Höhna, S., M. J. Landis, T. A. Heath, B. Boussau, N. Lartillot, B. R. Moore,  
725 J. P. Huelsenbeck, and F. Ronquist. 2016. Revbayes: Bayesian phylogenetic  
726 inference using graphical models and an interactive model-specification  
727 language. *Systematic Biology* 65:726–736.
- 728 Klingen, T. R., S. Reimering, C. A. Guzmán, and A. C. McHardy. 2018. In  
729 silico vaccine strain prediction for human influenza viruses. *Trends in*  
730 *microbiology* 26:119–131.
- 731 Lam, T. T.-Y., B. Zhou, J. Wang, Y. Chai, Y. Shen, X. Chen, C. Ma,  
732 W. Hong, Y. Chen, Y. Zhang, L. Duan, P. Chen, J. Jiang, Y. Zhang, L. Li,

- 733 L. L. M. Poon, R. J. Webby, D. K. Smith, G. M. Leung, J. S. M. Peiris,  
734 E. C. Holmes, Y. Guan, and H. Zhu. 2015. Dissemination, divergence and  
735 establishment of H7N9 influenza viruses in china. *Nature* 522:102–105.
- 736 Ledda, A., J. R. Price, K. Cole, M. J. Llewelyn, A. M. Kearns, D. W. Crook,  
737 J. Paul, and X. Didelot. 2017. Re-emergence of methicillin susceptibility in a  
738 resistant lineage of *Staphylococcus aureus*. *J. Antimicrob. Chemother.*  
739 72:1285–1288.
- 740 McCloskey, R. M. and A. F. Poon. 2017. A model-based clustering method to  
741 detect infectious disease transmission outbreaks from sequence variation.  
742 *PLoS Comput. Biol.* 13:e1005868.
- 743 Miller, R., J. Price, E. Batty, X. Didelot, D. Wyllie, T. Golubchik, D. W.  
744 Crook, J. Paul, T. E. A. Peto, D. J. Wilson, M. Cule, C. Ip, N. Day,  
745 C. Moore, R. Bowden, and M. Llewelyn. 2014. Healthcare-associated  
746 outbreak of methicillin-resistant *Staphylococcus aureus* bacteraemia: role of a  
747 cryptic variant of an epidemic clone. *J. Hosp. Infect.* 86:83–89.
- 748 Miura, S., K. Tamura, S. L. K. Pond, L. A. Huuki, J. Priest, J. Deng, and  
749 S. Kumar. 2019. A new method for inferring timetrees from temporally  
750 sampled molecular sequences. *BioRxiv* Page 620187.
- 751 Mostowy, R., N. J. Croucher, C. P. Andam, J. Corander, W. P. Hanage, and  
752 P. Marttinen. 2017. Efficient inference of recent and ancestral recombination  
753 within bacterial populations. *Mol. Biol. Evol.* 34:1167–1182.
- 754 Notohara, M. 1990. The coalescent and the genealogical process in  
755 geographically structured population. *J. Math. Biol.* 29:59–75.
- 756 Oaks, J. R., N. LBahy, and K. A. Cobb. 2019. Insights from a general,  
757 full-likelihood bayesian approach to inferring shared evolutionary events

- 758 from genomic data: Inferring shared demographic events is challenging.  
759 bioRxiv Page 679878.
- 760 Rambaut, A. and N. C. Grass. 1997. Seq-Gen: an application for the Monte  
761 Carlo simulation of DNA sequence evolution along phylogenetic trees.  
762 *Bioinformatics* 13:235–238.
- 763 Sagulenko, P., V. Puller, and R. A. Neher. 2018. Treetime:  
764 Maximum-likelihood phylodynamic analysis. *Virus Evolution* 4:vex042.
- 765 Suchard, M. A., P. Lemey, G. Baele, D. L. Ayres, A. J. Drummond, and  
766 A. Rambaut. 2018. Bayesian phylogenetic and phylodynamic data  
767 integration using beast 1.10. *Virus Evolution* 4:vey016.
- 768 Tamura, K., Q. Tao, and S. Kumar. 2018. Theoretical foundation of the  
769 RelTime method for estimating divergence times from variable evolutionary  
770 rates. *Mol. Biol. Evol.* 35:1770–1782.
- 771 To, T.-H., M. Jung, S. Lycett, and O. Gascuel. 2016. Fast dating using  
772 Least-Squares criteria and algorithms. *Systematic Biology* 65:82–97.
- 773 Tonkin-Hill, G., J. A. Lees, S. D. Bentley, S. D. W. Frost, and J. Corander.  
774 2018. RhierBAPS: An R implementation of the population clustering  
775 algorithm hierBAPS. *Wellcome Open Res* 3:93.
- 776 Tonkin-Hill, G., J. A. Lees, S. D. Bentley, S. D. W. Frost, and J. Corander.  
777 2019. Fast hierarchical Bayesian analysis of population structure. *Nucleic  
778 Acids Res.* Pages 1–11.
- 779 Vaughan, T. G. and A. J. Drummond. 2013. A stochastic simulator of  
780 birth–death master equations with application to phylodynamics. *Molecular  
781 biology and evolution* 30:1480–1493.

- 782 Vinh, N. X., J. Epps, and J. Bailey. 2010. Information theoretic measures for  
783 clusterings comparison: Variants, properties, normalization and correction  
784 for chance. *Journal of Machine Learning Research* 11:2837–2854.
- 785 Volz, E. M. and X. Didelot. 2018. Modeling the growth and decline of  
786 pathogen effective population size provides insight into epidemic dynamics  
787 and drivers of antimicrobial resistance. *Systematic Biology* 67:719–728.
- 788 Volz, E. M. and S. D. W. Frost. 2017. Scalable relaxed clock phylogenetic  
789 dating. *Virus Evolution* 3.
- 790 Wakeley, J. 2009. *Coalescent theory: an introduction*. Greenwood Village:  
791 Roberts & Company Publishers.
- 792 Whittles, L. K., P. J. White, and X. Didelot. 2017. Estimating the fitness  
793 benefit and cost of cefixime resistance in *Neisseria gonorrhoeae* to inform  
794 prescription policy: A modelling study. *PLoS Med.* 14:e1002416.
- 795 Wiuf, C. and P. Donnelly. 1999. Conditional genealogies and the age of a  
796 neutral mutant. *Theor. Popul. Biol.* 56:183–201.
- 797 Yu, G., D. K. Smith, H. Zhu, Y. Guan, and T. T.-Y. Lam. 2017. ggtree: an r  
798 package for visualization and annotation of phylogenetic trees with their  
799 covariates and other associated data. *Methods in Ecology and Evolution*  
800 8:28–36.
- 801 Zhang, J., P. Kapli, P. Pavlidis, and A. Stamatakis. 2013. A general species  
802 delimitation method with applications to phylogenetic placements.  
803 *Bioinformatics* 29:2869–2876.



**Data:** 1) Disjoint sets of tips  $X$  and  $Y$   
 2) Empirical value of test statistic  $\hat{R}$   
 3) Number of simulations  $n_{\text{sim}}$   
 4) Taxonomic condition  $E$  (see Equations 3, 4 or 10)  
**Result:** Two-sided p-value denoted  $q = \xi(X, Y, \hat{R})$ .  
 Initialisation;  
 Form a time-ordered sequence of nodes

$$U = (u_1, \dots, u_{|D_X|+|D_Y|}) | u_i \in (D_X \cup D_Y), \tau(u_i) \geq \tau(u_{i+1})$$

Form a corresponding numeric sequence:

$\Upsilon = (v_1, \dots, v_{|D_X|+|D_Y|})$  where

$$v_i = \begin{cases} 1 & \text{if } u_i \in X \\ -1 & \text{if } u_i \in Y \\ 0 & \text{if } u_i \in (D_X \cup D_Y) \cap \mathcal{I} \end{cases}$$

**for**  $k = 1$  to  $n_{\text{sim}}$  **do**  
      $z \leftarrow 0$  (simulated lineages through time in clade  $X$ )  
      $w \leftarrow 0$  (simulated lineages through time in clade  $Y$ )  
      $r_{\text{sim}} \leftarrow 0$  (simulated rank-sum statistic)  
      $c \leftarrow 0$  (number of coalescent events simulated)  
     **for**  $i = 1$  to  $|D_X| + |D_Y|$  **do**  
         **if**  $v_i = 1$  **then**  
             Account for sample in  $X$ :  $z \leftarrow z + 1$  ;  
         **if**  $v_i = -1$  **then**  
             Account for sample in  $Y$ :  $w \leftarrow w + 1$  ;  
         **if**  $W_i = 0$  **then**  
             Increment coalescent counter:  $c \leftarrow c + 1$  ;  
             Compute probability  $\tilde{p} = \tilde{Q}_E(z, w)$  that next coalescent is in  
              $D_X$  or  $D_Y$  using Equation 3, 4 or 10;  
             Draw a random uniform variable  $\omega \leftarrow \text{Unif}(0, 1)$  ;  
             **if**  $\omega < \tilde{p}$  **then**  
                  $z \leftarrow z - 1$   
                  $r_{\text{sim}} \leftarrow r_{\text{sim}} + c$   
             **else**  
                  $w \leftarrow w - 1$   
         **end**  
     Record simulated statistic:  
      $R_k \leftarrow r_{\text{sim}}$   
**end**

804

Compute number of simulations more and less than empirical value:

$$m_+ \leftarrow |\{r' \in R_k | r' > \hat{R}\}|$$

$$m_- \leftarrow |\{r' \in R_k | r' < \hat{R}\}|$$

Return  $\min(\frac{m_+}{n_{\text{sim}}}, \frac{m_-}{n_{\text{sim}}})$ .

**Algorithm 1:** Algorithm for computing the null distribution and associated p-value of the test-statistic for cladistic outliers.



**Data:** Time-scale genealogy  $\mathcal{G}$   
**Result:** Partition of tips of tree, denoted  $M$ .  
 Initialise ‘active set’ to consist of root node:  $\Omega \leftarrow \{\text{root}\}$  ;  
 Initialise partition:  $M \leftarrow \emptyset$  ;  
**for**  $u \in \mathcal{I}$  (*internal nodes*) **do**  
 | Initialise  $\tilde{C}_u \leftarrow C_u$  ;  
**end**  
**while**  $|\Omega| > 0$  **do**  
 | Initialise  $\Omega' \leftarrow \Omega$  ;  
 | **for**  $u \in \Omega$  **do**  
 | | Find biggest outlier descended from  $u$ :  
 | |  $v^* \leftarrow \operatorname{argmax}_{v \in C_u} f(v) = \xi(\tilde{C}_u \setminus \tilde{C}_v, \tilde{C}_v)$  (Algorithm 1);  
 | |  $q \leftarrow \xi(\tilde{C}_u, \tilde{C}_{v^*})$  ;  
 | | **if**  $q < \alpha$  **then**  
 | | |  $\Omega' \leftarrow \Omega' \cup v^*$  ;  
 | | |  $\tilde{C}_u \leftarrow \tilde{C}_u \setminus C_{v^*}$  ;  
 | | **else**  
 | | | No significant outliers, so remove  $u$  from active sets:  
 | | |  $\Omega' \leftarrow \Omega' \setminus u$  ;  
 | | | Add the clade descended from  $u$  to the partition:  
 | | |  $M \leftarrow M \cup \{\mathcal{T} \cap \tilde{C}_u\}$  ;  
 | | **end**  
 | **end**  
 |  $\Omega \leftarrow \Omega'$ .  
**end**  
 Return  $M$ .  
**Algorithm 2:** Algorithm for detecting cladistic outliers.

805

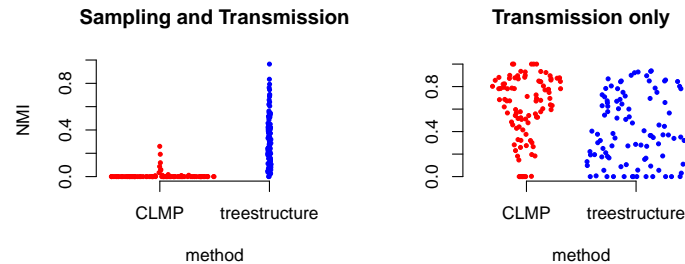

806

807 Figure S1: The normalised mutual information (NMI) for 100 previously  
808 published simulations (McCloskey and Poon 2017). This describes accuracy of  
809 classification of tips into outbreaks using the *treestructure* method and CLMP  
810 (McCloskey and Poon 2017). Results on left were based on simulations where  
811 both transmission and sampling rates varied in the outbreak cluster, whereas  
812 simulations on the right only allowed transmission rates to vary.

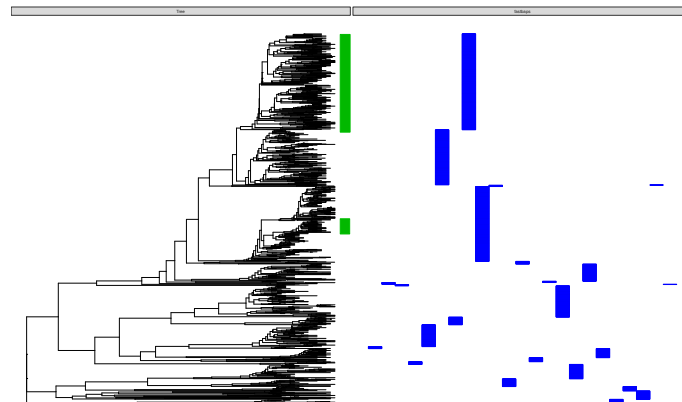

813

814 Figure S2: The output of FastBAPS classification applied to 1102 *N.*  
815 *gonorrhoeae* isolates described in the main text. Clades indicated in green have  
816 CFX resistance.

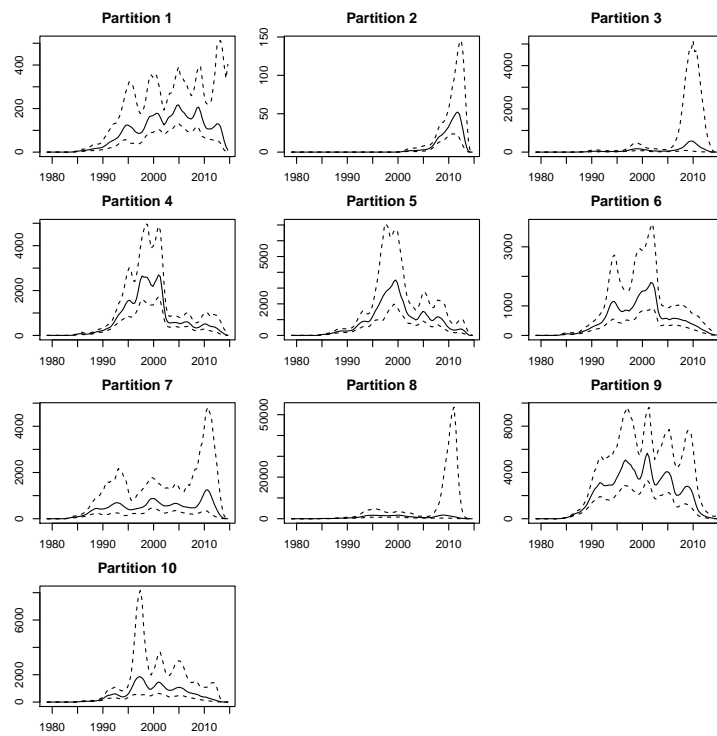

817

818 Figure S3: Estimated effective population size through time for each partition  
819 in the Tennessee HIV-1 phylogeny.  $N_e(t)$  was estimated using the *skygrowth*  
820 method (Volz and Didelot 2018) with precision parameter  $\tau = 1$ .

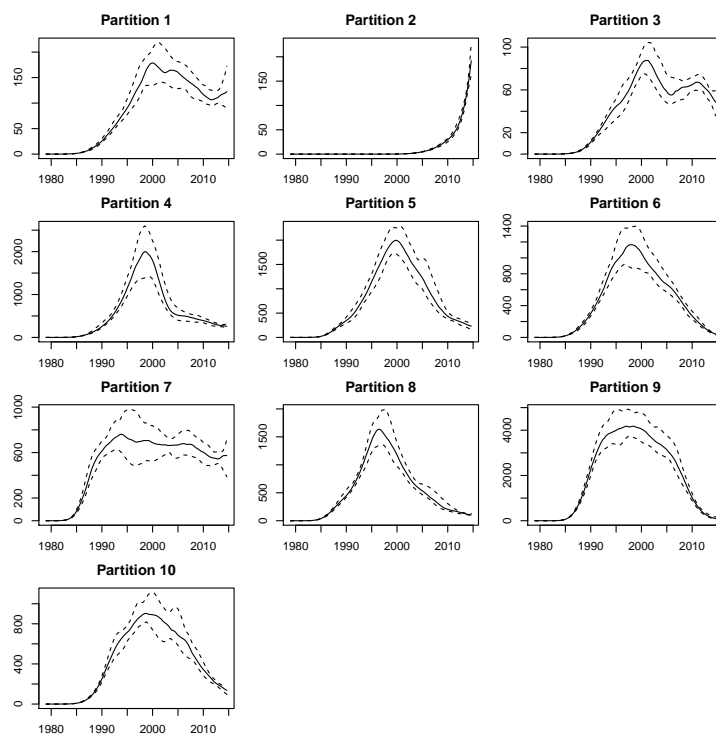

821

822 Figure S4: Estimated effective population size through time for each partition  
823 in the Tennessee HIV-1 phylogeny.  $N_e(t)$  was estimated using the *skygrowth*  
824 method (Volz and Didelot 2018) with precision parameter  $\tau = 100$ .
